# Supplementary material for: The effects of restrictive measures due to the COVID-19 pandemic on the extensive farming system of small ruminants
Source: Copernicus journal article supplement (doi:10.5194/aab-65-157-2022), 2022-05-02
Supplement: Supplementary file [file aab-65-157-2022-supplement.pdf]

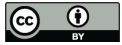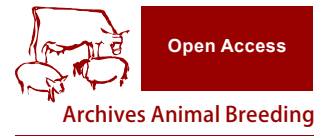

*Supplement of*

## **The effects of restrictive measures due to the COVID-19 pandemic on the extensive farming system of small ruminants**

**Maria D. Yiakoulaki et al.**

*Correspondence to:* Maria D. Yiakoulaki (yiak@for.auth.gr)

The copyright of individual parts of the supplement might differ from the article licence.

**Supplement (Sect. S1):** A questionnaire for the effects of restrictive measures due to Covid-19 pandemic on the extensive farming system of sheep and goats.

| Consent Provision                                        |                                         |                                               |
|----------------------------------------------------------|-----------------------------------------|-----------------------------------------------|
| Please provide your consent to participate in this study | <input type="checkbox"/> Yes, I consent | <input type="checkbox"/> No, I do not consent |
| Research's Code Number:                                  |                                         |                                               |
| Date:                                                    |                                         |                                               |

| No                                | Question                                       |
|-----------------------------------|------------------------------------------------|
| <b>1 Livestock holding's info</b> |                                                |
| 01                                | Farm's National Reference Number (No):         |
| 02                                | Breeder's Name:                                |
| 03                                | In which Local Community is your farm located? |

| 2  | Breeder's profile                                                                                                                                                                                                                  |
|----|------------------------------------------------------------------------------------------------------------------------------------------------------------------------------------------------------------------------------------|
| 04 | Gender<br>Male <input type="checkbox"/> Female <input type="checkbox"/>                                                                                                                                                            |
| 05 | Please indicate your age group<br>21-30 years <input type="checkbox"/> , 31-40 years <input type="checkbox"/> , 41-50 years <input type="checkbox"/> , 51-60 years <input type="checkbox"/> , 61-70 years <input type="checkbox"/> |
| 06 | Please indicate your educational level<br>Primary School <input type="checkbox"/> Middle School <input type="checkbox"/> High School <input type="checkbox"/>                                                                      |
|    | Technological Educational Institute's degree <input type="checkbox"/> Bachelor's degree <input type="checkbox"/>                                                                                                                   |
| 07 | Do you have any other activities in addition to animal husbandry?<br>No <input type="checkbox"/> Yes <input type="checkbox"/>                                                                                                      |
| 08 | If yes, please specify.                                                                                                                                                                                                            |

| 3  | Livestock holdings characteristics                                                                                                                                                                                                                                                                             |
|----|----------------------------------------------------------------------------------------------------------------------------------------------------------------------------------------------------------------------------------------------------------------------------------------------------------------|
| 09 | Please define the type of your holding<br>Individual <input type="checkbox"/> Family <input type="checkbox"/>                                                                                                                                                                                                  |
| 10 | Number of family employees in your holding (No)<br>1 <input type="checkbox"/> 2 <input type="checkbox"/> 3 <input type="checkbox"/>                                                                                                                                                                            |
| 11 | Number of non-family employees in your holding (No)<br>0 <input type="checkbox"/> 1 <input type="checkbox"/> 2 <input type="checkbox"/>                                                                                                                                                                        |
| 12 | Please define the applied farming system in your holding<br>Sedentary <input type="checkbox"/> (Animals can freely utilize the pastures that are allocated to the village where the breeder resides)<br>Transhumant <input type="checkbox"/> (Seasonal movement of animals between winter and summer pastures) |
| 13 | Kind of raised animal species<br>Sheep <input type="checkbox"/> Goats <input type="checkbox"/>                                                                                                                                                                                                                 |
| 14 | Number of animal species (No)                                                                                                                                                                                                                                                                                  |
| 15 | Please specify the structure of flock in your holding<br>Sheep <input type="checkbox"/> Goats <input type="checkbox"/> Mixed <input type="checkbox"/>                                                                                                                                                          |
| 16 | Please specify the orientation of production in your holding<br>Milk <input type="checkbox"/> Meat <input type="checkbox"/> Mixed <input type="checkbox"/>                                                                                                                                                     |

|            |                                                                                                                                                                                                                                                 |                                                                                                                                                  |                                                                                                                                                  |                                               |
|------------|-------------------------------------------------------------------------------------------------------------------------------------------------------------------------------------------------------------------------------------------------|--------------------------------------------------------------------------------------------------------------------------------------------------|--------------------------------------------------------------------------------------------------------------------------------------------------|-----------------------------------------------|
| <b>4</b>   | <b>Effect of Covid-19 and Restrictive Measures on:</b>                                                                                                                                                                                          |                                                                                                                                                  |                                                                                                                                                  |                                               |
| <b>4.1</b> | <b>Breeders</b>                                                                                                                                                                                                                                 |                                                                                                                                                  |                                                                                                                                                  |                                               |
| 17         | Did Covid-19 pandemic affect your health?                                                                                                                                                                                                       | No <input type="checkbox"/>                                                                                                                      | Yes <input type="checkbox"/>                                                                                                                     |                                               |
| 18         | If yes, how were you affected?                                                                                                                                                                                                                  | Directly <input type="checkbox"/><br>(Infected)                                                                                                  | Indirectly <input type="checkbox"/><br>(Psychologically, due to the increased stress and anxiety)                                                |                                               |
| 19         | How did the restrictive measures affect your daily work routine?                                                                                                                                                                                | Negatively <input type="checkbox"/>                                                                                                              | Neutrally <input type="checkbox"/>                                                                                                               | Positively <input type="checkbox"/>           |
| 20         | Please specify for how long your daily work routine was affected                                                                                                                                                                                |                                                                                                                                                  |                                                                                                                                                  |                                               |
| <b>4.2</b> | <b>Animal Management Practices</b>                                                                                                                                                                                                              |                                                                                                                                                  |                                                                                                                                                  |                                               |
| 21         | Has there been any change in the daily movement of animals in pastures?<br>(In the meaning of duration of grazing time in pastures as well as the daily sheep and goats travel distance to cover their nutritional needs)                       | No change <input type="checkbox"/>                                                                                                               | Increased <input type="checkbox"/>                                                                                                               | Reduced <input type="checkbox"/>              |
| 22         | Has there been any change in the quantity of the administered feedstuffs?                                                                                                                                                                       | No change <input type="checkbox"/>                                                                                                               | Increased <input type="checkbox"/>                                                                                                               | Reduced <input type="checkbox"/>              |
| 23         | Has there been any change in the animal capital of your holding?                                                                                                                                                                                | No change <input type="checkbox"/>                                                                                                               | Increased <input type="checkbox"/>                                                                                                               | Reduced <input type="checkbox"/>              |
| 24         | Has there been any improvement in the hygienic conditions of your holding?<br>(In the meaning of keeping the farm environment cleaner, wearing a mask when coming in contact with the workers, washing hands more often, and using antiseptics) | No change <input type="checkbox"/>                                                                                                               |                                                                                                                                                  | Yes, I improved them <input type="checkbox"/> |
| <b>4.3</b> | <b>Animal Products</b>                                                                                                                                                                                                                          |                                                                                                                                                  |                                                                                                                                                  |                                               |
| 25         | Has there been any change in the demand for animal products?                                                                                                                                                                                    | No change <input type="checkbox"/>                                                                                                               | Increased <input type="checkbox"/>                                                                                                               | Reduced <input type="checkbox"/>              |
| 26         | Which animal products were affected?                                                                                                                                                                                                            | Milk <input type="checkbox"/>                                                                                                                    | Meat <input type="checkbox"/>                                                                                                                    |                                               |
| 27         | How much was approximately the change (%)?                                                                                                                                                                                                      | 10 <input type="checkbox"/> 20 <input type="checkbox"/> 30 <input type="checkbox"/><br>40 <input type="checkbox"/> More <input type="checkbox"/> | 10 <input type="checkbox"/> 20 <input type="checkbox"/> 30 <input type="checkbox"/><br>40 <input type="checkbox"/> More <input type="checkbox"/> |                                               |
| 28         | Has there been any change in the price of animal products?                                                                                                                                                                                      | No change <input type="checkbox"/>                                                                                                               | Increased <input type="checkbox"/>                                                                                                               | Reduced <input type="checkbox"/>              |
| 29         | If yes, which products' price was affected?                                                                                                                                                                                                     | Milk <input type="checkbox"/>                                                                                                                    |                                                                                                                                                  | Meat <input type="checkbox"/>                 |
| 30         | Which time period did you observe the change?                                                                                                                                                                                                   |                                                                                                                                                  |                                                                                                                                                  |                                               |
| <b>4.4</b> | <b>Labor-Personnel</b>                                                                                                                                                                                                                          |                                                                                                                                                  |                                                                                                                                                  |                                               |
| 31         | Has there been any change in the number of non-family employees of your holding during the restrictive measures?                                                                                                                                | No change <input type="checkbox"/>                                                                                                               | Increased <input type="checkbox"/>                                                                                                               | Reduced <input type="checkbox"/>              |
| 32         | Was there an observed lack of new laborers/workers during the restrictive measures?                                                                                                                                                             | No <input type="checkbox"/>                                                                                                                      |                                                                                                                                                  | Yes <input type="checkbox"/>                  |
|            | Do you have any questions?<br>Are there any comments?                                                                                                                                                                                           |                                                                                                                                                  |                                                                                                                                                  |                                               |
